# Supplementary material for: Studying the Effects of Dissolved Noble Gases and High Hydrostatic Pressure on the Spherical DOPC Bilayer Using Molecular Dynamic Simulations
Source: MDPI journal article supplement (doi:10.3390/membranes14040089), 2024-04-12
Supplement: s1 [file s1]

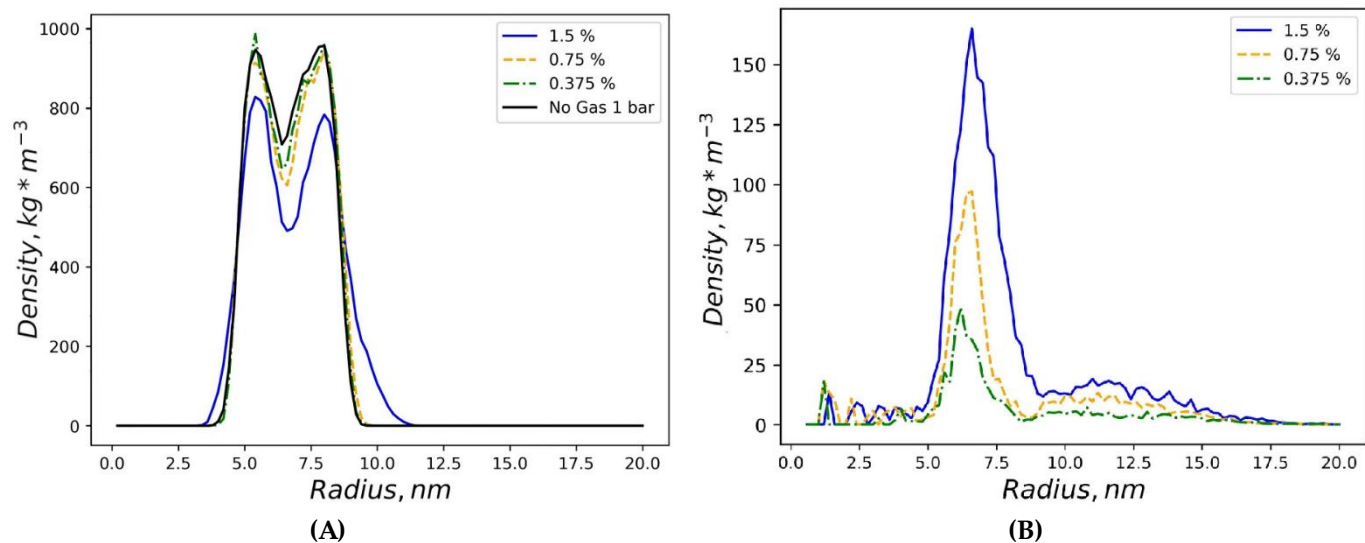

**Figure S1.** Isotropic pressure coupling simulations ( $t = 50$  ns, last 10ns have been used for density analysis). **(A)** DOPC lipids density at 1 bar with various molar concentrations of dissolved argon: 0%; 0,375%; 0,750% and 1.5%; **(B)** The dissolved argon at 1 bar with various molar concentrations: 0,375%, 0,750% and 1.5%; The liposome's center of mass located at  $x = 0$  at the origin of the x axis. .

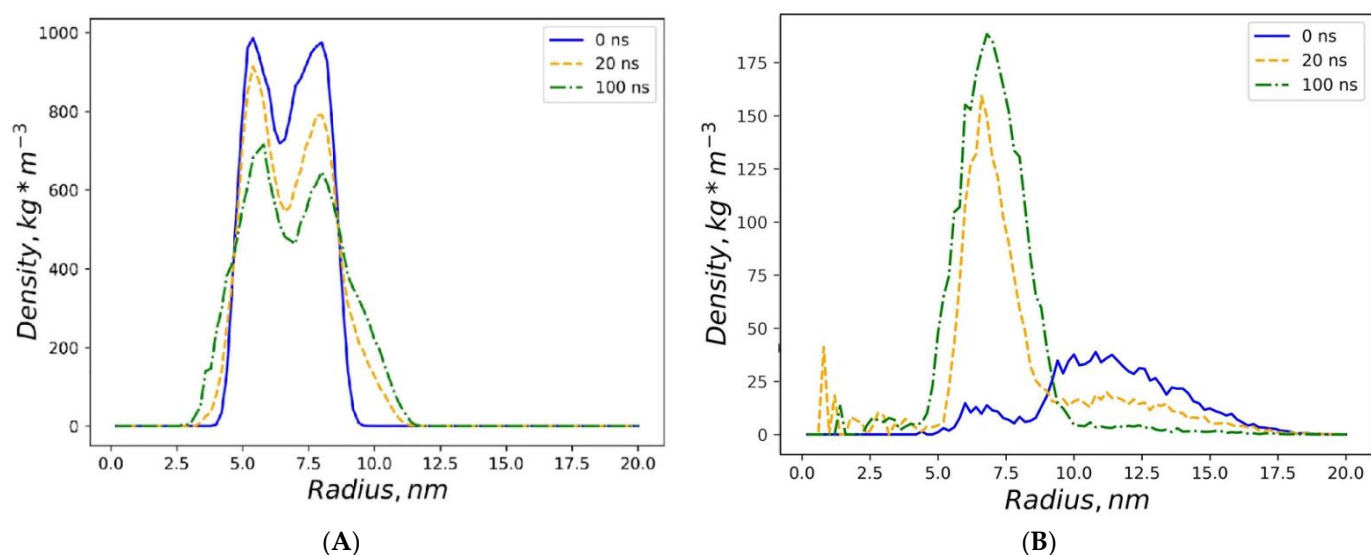

**Figure S2.** Isotropic pressure coupling simulations. **(A)** DOPC lipids density at 25 bar with 1.5% argon concentrations, MD frames:  $t = 0, 20, 100$  ns; **(B)** The dissolved argon density at 25 bar with 1.5% concentrations, MD frames:  $t = 0, 20, 100$ ns. The liposome's center of mass located at  $x = 0$  at the origin of the x axis.

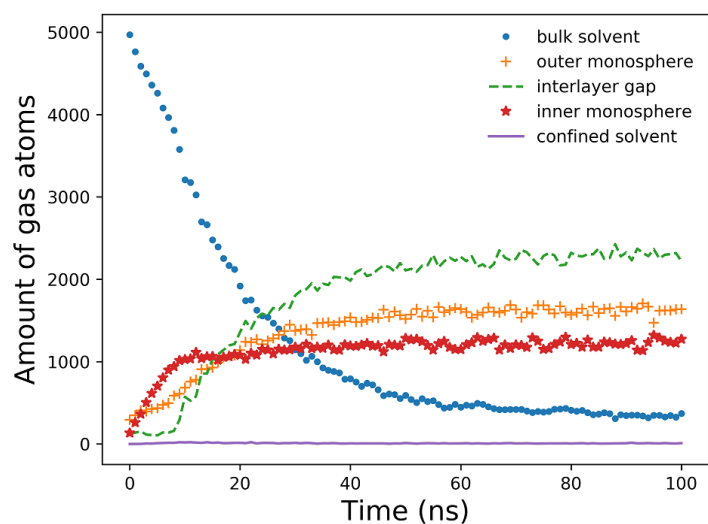

**Figure S3.** Isotropic pressure coupling simulation. Argon atoms counter is presented at 25 bar for 5 compartments of the simulation box vs. MD time (100 ns).

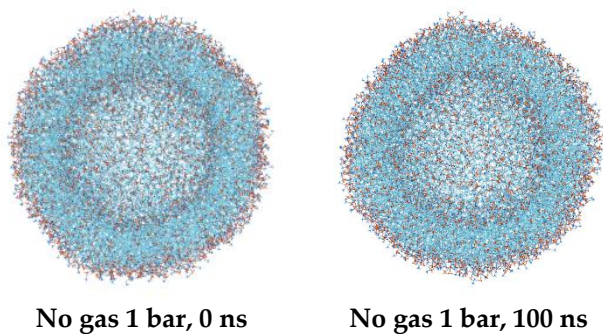

**Figure S4.** Semi-Isotropic Pressure coupling. Representative MD trajectory frames of DOPC liposome at 1bar; at  $t=0, 100$  ns.

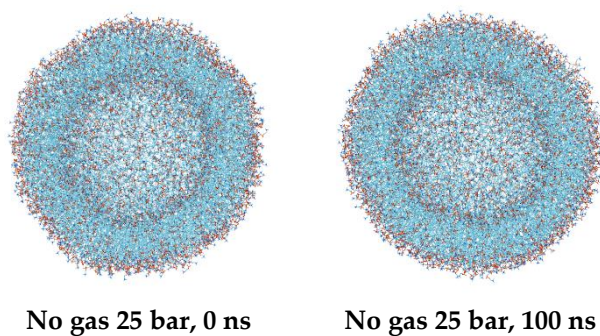

**Figure S5.** Semi-Isotropic Pressure Coupling. Representative MD trajectory frames of DOPC liposome at 25bar; at  $t=0, 100$  ns.

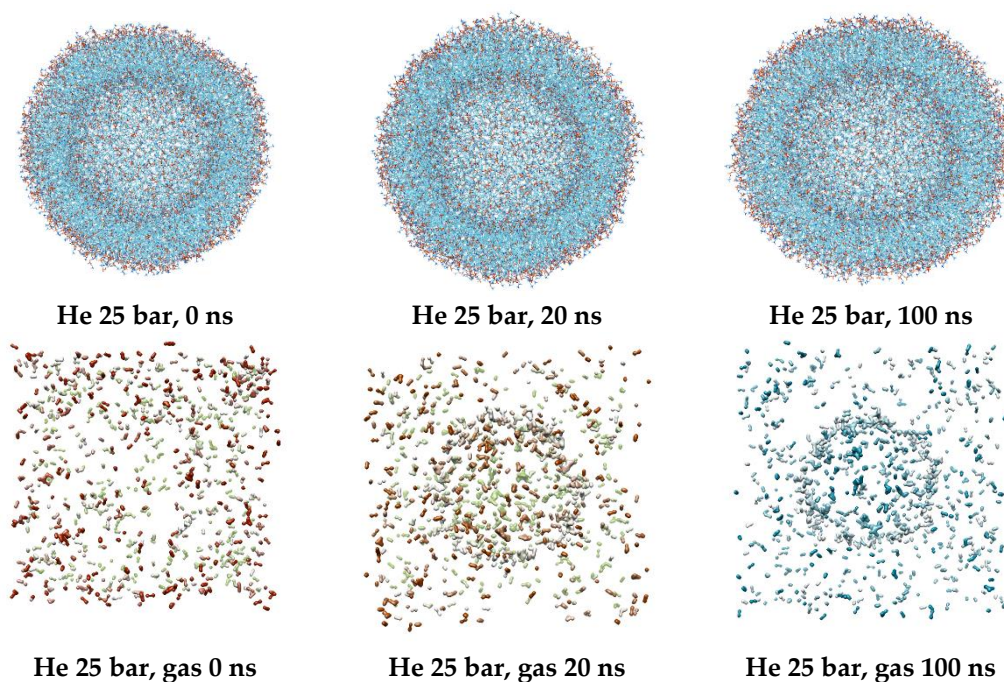

**Figure S6.** Semi-Isotropic Pressure Coupling. Representative MD trajectory frames of DOPC liposome and dissolved helium at 25bar; MD frames are shown at  $t = 0, 20, 100$  ns.

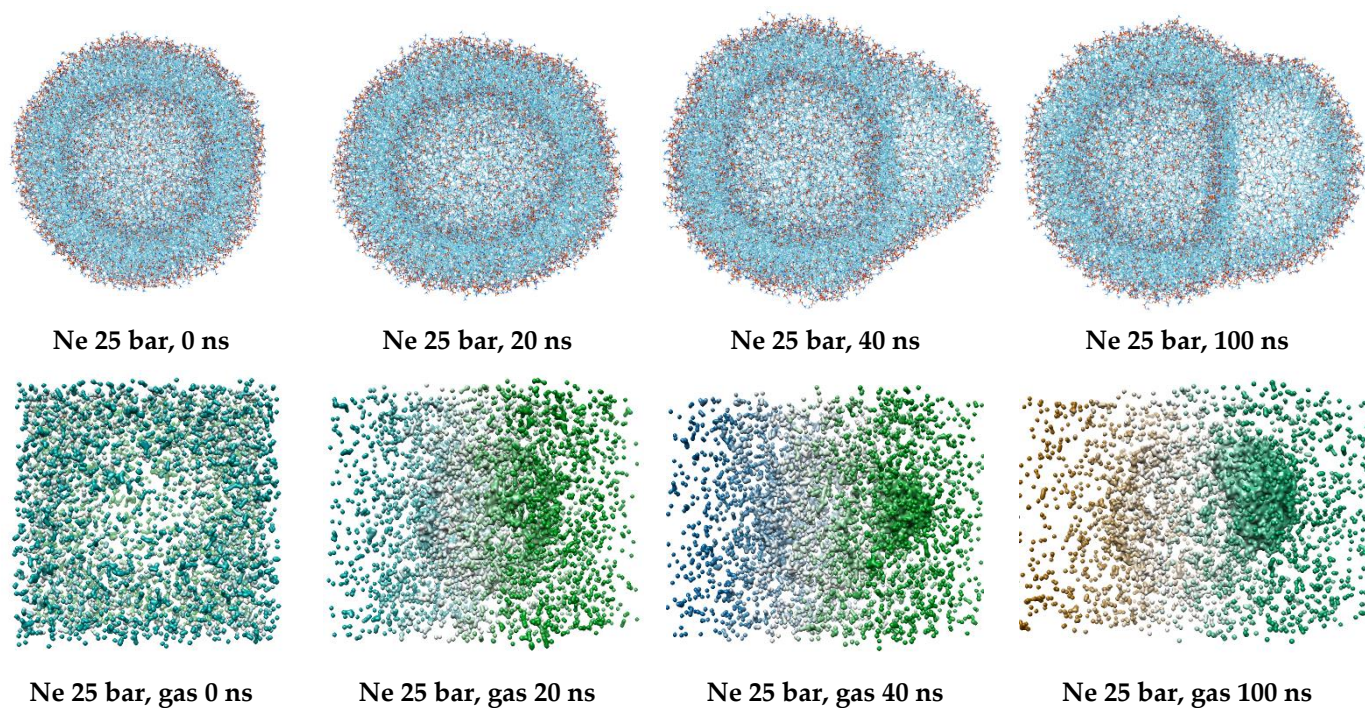

**Figure S7.** Semi-Isotropic Pressure Coupling. Representative MD trajectory frames of DOPC liposome and dissolved neon at 25bar; MD frames are shown at  $t = 0, 20, 40, 100$  ns.



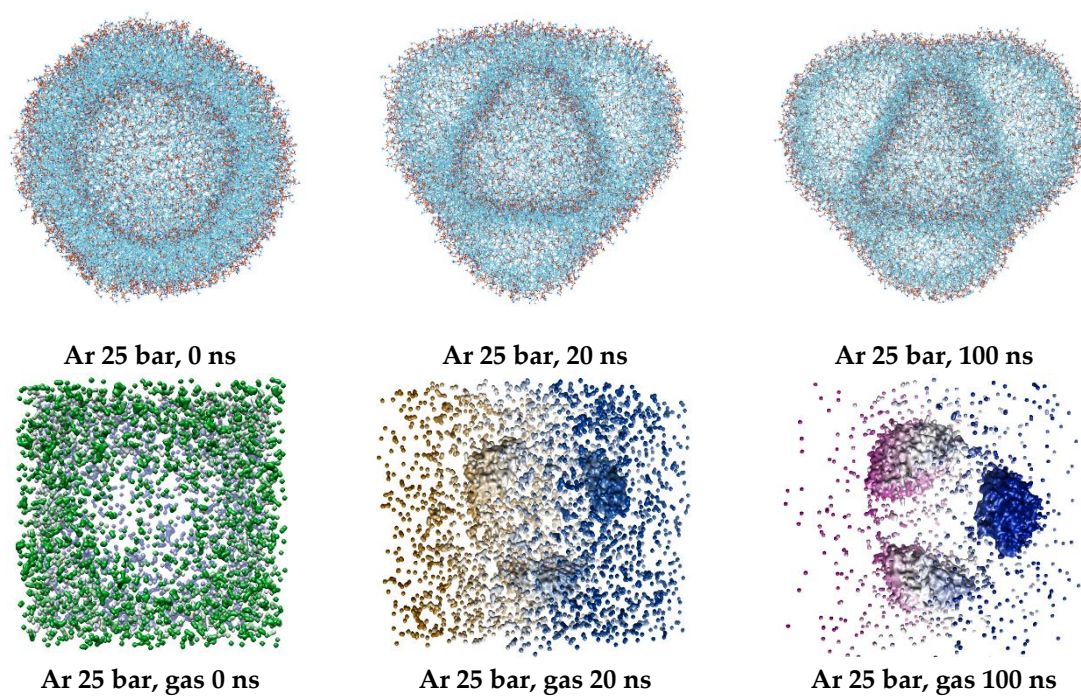

**Figure S8.** Semi-Isotropic Pressure Coupling. Representative MD trajectory frames of DOPC liposome and dissolved argon at 25bar; MD frames are shown at  $t = 0, 20, 100$  ns.

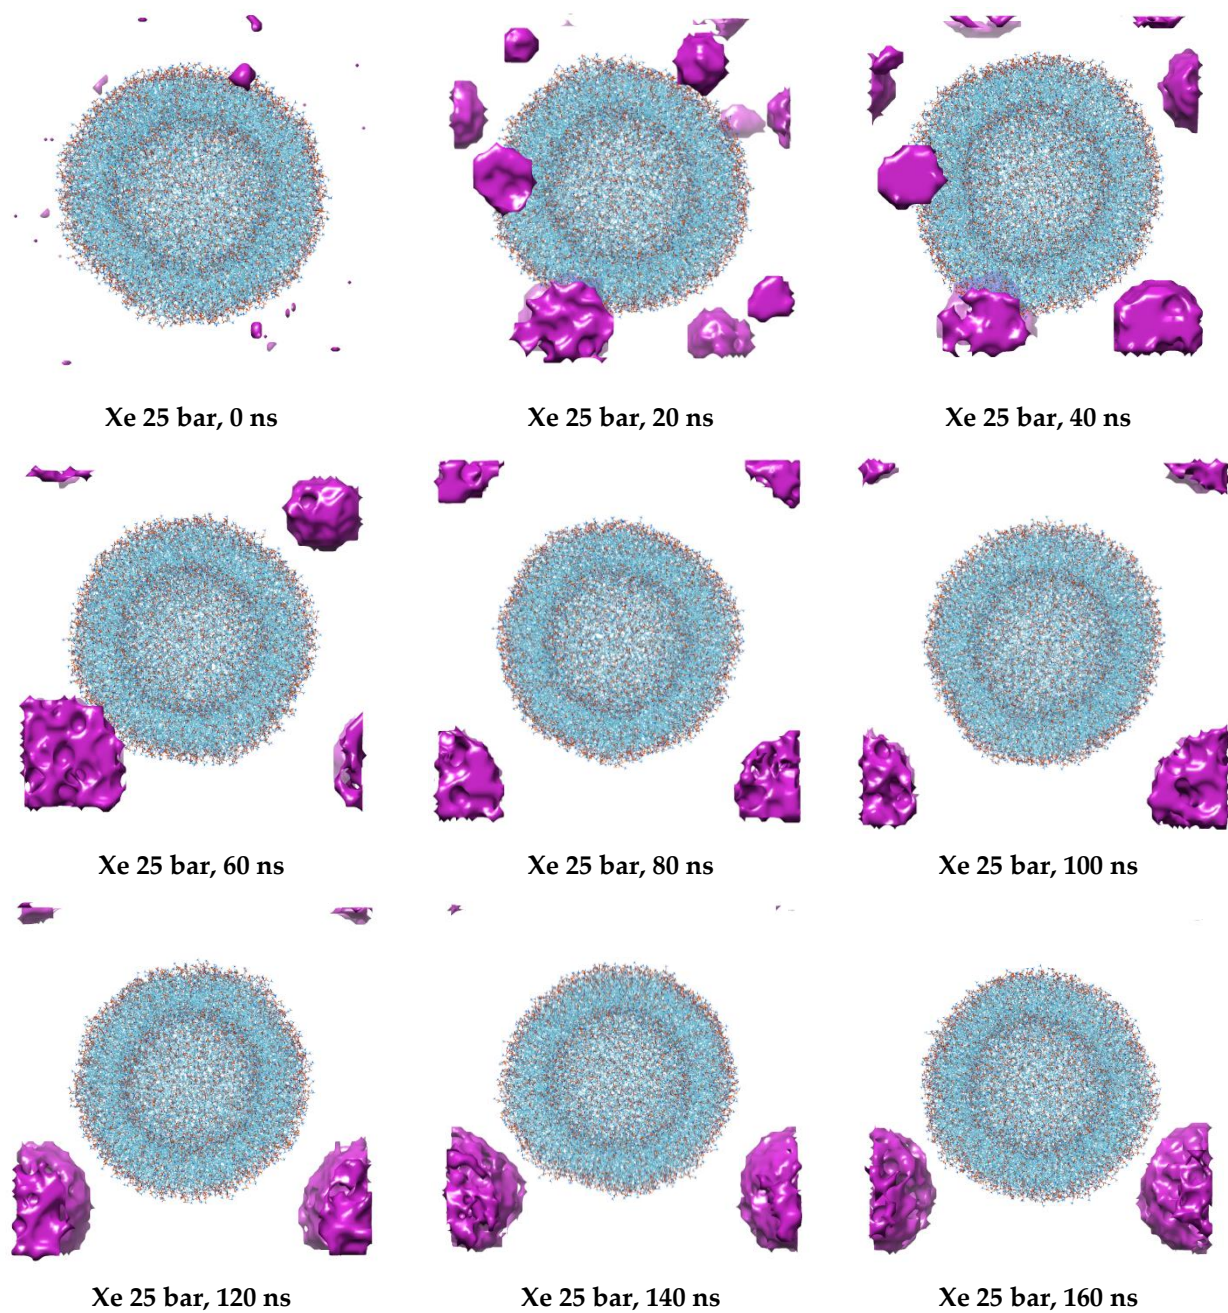

**Figure S9.** Semi-Isotropic Pressure Coupling. Representative MD trajectory frames of DOPC liposome and dissolved xenon at 25bar; MD frames are shown at  $t = 0, 20, 40, 60, 80, 100, 120, 140, 160$  ns.
